# Supplementary material
Source: publisher figshare collection journal article supplement (https://tandf.figshare.com/ndownloader/files/18054827)
Supplement: Supplementary file 1 [file 18054827]

# Appendix B: MATLAB source codes

clear all;

clc;

D = input('Please input the pool diameter');

H = input('Please input the pool thickness');

h_1 = input('Please input the heat transfer coefficient between liquid and concrete'); h_2 = input('Please input the heat dissipation coefficient of concrete');

K_2 = 10; % Heat transfer coefficient between the flame and the concrete

C_d = 1750; % Specific heat capacity of diesel

lamda_d = 0.15; % Thermal conductivity of diesel

rho_d = 830; % Density of diesel

alpha_d = lamda_d/(rho_d*C_d); % Thermal diffusivity

L_v = 250000; % Latent heat of vaporization

upsilon_d = 6*10^(-6); % Diesel kinematic viscosity

pr = upsilon_d/alpha_d;

T_L = zeros(1,1800);

T_F = zeros(1,1800);

for i = 1 : 1800

if i < 300

T_L(i) = 273+242/300^2*i^2;

else

T_L(i) = 515;

end

end

for i = 1 : 1800

if i < 300

T_F(i) = 273+873/300^2*i^2;

else

T_F(i) = 1146;

end

end

T_0 = 293; % Initial temperature of liquid

sigma = 5.67*10^(-8); % Blackbody emissivity

Q_rad = zeros(1,1800); % Radiation heat absorption

K = zeros(1,1800); % Effective emission coefficient

epsilon_F = zeros(1,1800); % Flame emissivity

V_L = zeros(1,1800); % Burning line speed

R = zeros(1,1800); % Thickness of pool fire burning

if D < 0.1

K_1 = 10;

else

K_1 = 0; % Coefficient

end

X_F = 1; % Angular coefficient

C_0 = 4;

C_2 = 1.4388/100;

f_v = 2*10^(-6);

H_F = 0.23*(430.46*pi*D^2/4-0.4978)^(2/5)-1.02*D;

V_F = pi*D^2*H_F/12;

A_F = pi*D/2*(((H_F)^2+ (D/2)^2 )^0.5+0.5);h_r = 0.07 - H;

F = 1 + (2*h_r/D)^2/2 - (2*h_r/D)/2*((2*h_r/D)^2+4)^0.5;

L = 3.6*V_F/A_F; % Average optical length of the flame body

epsilon_L = 0.42; % Liquid emissivity

epsilon_1 = 0.08; % Flame reflectivity to liquid

h = 400; % Natural convection heat transfer coefficient of diesel

T_B = zeros(1,1800);

alpha_v = 0.000725;

G_r = zeros(1,1800);

N_u = zeros(1,1800);

lamda = zeros(1,1800);

C_11 = zeros(1,1800);

C_21 = zeros(1,1800);

for i = 1 : 1800

K(i) = 3.72*C_0*f_v*T_F(i)/C_2;% Effective emission coefficient

epsilon_F(i) = 1-exp(-K(i)*L);% Flame emissivity

Q_rad(i) = epsilon_F(i)*sigma*T_F(i)^4*F*X_F*(1-epsilon_1)-epsilon_L*sigma*T_L(i)^4;

end

for i = 1 : 1800

if Q_rad(i) > 0

Q_rad(i) = epsilon_F(i)*sigma*T_F(i)^4*F*X_F*(1-epsilon_1)-epsilon_L*sigma*T_L(i)^4;

else

Q_rad(i) = 0;

end

end

for i = 1 : 1800

V_L(i) = 1/(rho_d*L_v+C_d*rho_d*(T_L(i)-T_0))*(4*K_1/D*(T_F(i)-T_L(i))+K_2*(T_F(i)-T_L(i))+Q_rad(i));% Burning speed

end

R(1)=0;

for i = 1 : 1799

R(i+1) = V_L(i)+R(i);

end

t_s = find(R<H, 1, 'last' );

if t_s >= 300

for i = 1 : 1800

if i < 300

T_L(i) = 293+222/300^2*i^2;

elseif i >= t_s

T_L(i) = 222*exp(-0.0067*(i-t_s))+293;

else

T_L(i) = 515;

end

end

for i = 1 : 1800

if i < 300

T_F(i)=293+853/300^2*i^2;

elseif i >= t_s

T_F(i) = 853*exp(-0.0067*(i-t_s))+293;

else

T_F(i) = 1146;

end

end

for i = 1 : 1800

K(i) = 3.72*C_0*f_v*T_F(i)/C_2; % Effective emission coefficient

epsilon_F(i) = 1-exp(-K(i)*L); % Flame emissivity

Q_rad(i) = epsilon_F(i)*sigma*T_F(i)^4*X_F*(1-epsilon_1)-epsilon_L*sigma*T_L(i)^4;

end

for i = 1 : 1800

if Q_rad(i) > 0

Q_rad(i) = epsilon_F(i)*sigma*T_F(i)^4*X_F*(1-epsilon_1)-epsilon_L*sigma*T_L(i)^4;

else

Q_rad(i) = 0;

end

end

for i = 1 : 1800

if i <= t_s

V_L(i) = 1/(rho_d*L_v+C_d*rho_d*(T_L(i)-T_0))*(4*K_1/D*(T_F(i)-T_L(i))+K_2*(T_F(i)-T_L(i))+Q_rad(i));% Burning speed

else

V_L(i) = 0;

end

end

for i = 1:1800

C_11(i) = T_L(i)-T_0;

C_21(i) = T_L(i)-C_11(i);

end

for i = 1:1800

G_r(i) = 9.8*alpha_v*(T_L(i)-T_B(i))*(H-R(i))^3/upsilon_d^2;

if G_r(i) > 4.6*10^5

N_u(i) = 0.061*(G_r(i)*pr)^(1/3);

else

N_u(i) = 0.212*(G_r(i)*pr)^(1/4);

end

end

for i = 1:1800

lamda(i) = h*(H-R(i))/ N_u(i);

end

for i = 1 : 1800

if i < t_s % If the remaining fuel thickness is greater than or equal to 0

T_B(i) = C_11(i)*exp(-rho_d*C_d*max(V_L)/(lamda_d+lamda(i))*(H-R(i)))+C_21(i);

else

T_B(i) = 222*exp(-0.002*(i-t_s))+293;

end

end

else

for i = 1 : 1800

if i<= t_s

T_L(i) = 293+222/300^2*i^2;

elseif i < 1000 && i > t_s

T_L(i) = 293+222/300^2*t_s^2*exp(-0.0067*(i-t_s));

else

T_L(i) = 293;

end

end

for i = 1 : 1800

if i <= t_s

T_F(i)=293+853/300^2*i^2;

elseif i < 1000 && i > t_s

T_F(i) = 293+853/300^2*t_s^2*exp(-0.0067*(i-t_s));

else

T_F(i) = 293;

end

end

for i = 1 : 1800

K(i)=3.72*C_0*f_v*T_F(i)/C_2; % Effective emission coefficient

epsilon_F(i)=1-exp(-K(i)*L); % Flame emissivity

Q_rad(i)=epsilon_F(i)*sigma*T_F(i)^4*X_F*(1-epsilon_1)-epsilon_L*sigma*T_L(i)^4;

end

for i = 1 : 1800

if Q_rad(i)>0

Q_rad(i) = epsilon_F(i)*sigma*T_F(i)^4*X_F*(1-epsilon_1)-epsilon_L*sigma*T_L(i)^4;

else

Q_rad(i) = 0;

end

end

for i = 1 : 1800

if i <= t_s

V_L(i) = 1/(rho_d*L_v+C_d*rho_d*(T_L(i)-T_0))*(4*K_1/D*(T_F(i)-T_L(i))+K_2*(T_F(i)-T_L(i))+Q_rad(i));% Burning speed

else

V_L(i) = 0;

end

end

for i = 1:1800

C_11(i)=T_L(i)-T_0;

C_21(i)=T_L(i)-C_11(i);

end

for i = 1:1800

G_r(i) = 9.8*alpha_v*(T_L(i)-T_B(i))*(H-R(i))^3/upsilon_d^2;

if G_r(i) > 4.6*10^5

N_u(i) = 0.061*(G_r(i)*pr)^(1/3);

else

N_u(i) = 0.212*(G_r(i)*pr)^(1/4);

end

end

for i = 1:1800

lamda(i) = h*(H-R(i))/ N_u(i);

end

for i = 1 : 1800

if i <= t_s % If the remaining fuel thickness is greater than or equal to 0

T_B(i) = C_11(i)*exp(-rho_d*C_d*max(V_L)/(lamda_d+lamda(i))*(H-R(i)))+C_21(i);

else

T_B(i) = C_11(t_s)*exp(-rho_d*C_d*max(V_L)/(lamda_d+lamda(t_s))*(H-R(t_s)))*exp(-0.002*(i-t_s))+293;

end

end

end

m = 1800; % Calculation time

n = 21; % Measuring points

T = zeros(m,n);

T(1,:) = 293; % Initial condition

T(:,21) = 293; % Boundary condition

dz = 0.025; % Cell length

dt = 1; % Time interval

rho_c = 2400; % Density of concrete

for i = 1 : 1799

if H - R(i) > 0

for j = 1 : 20

if j == 1

T(i+1,1)=(T_B(i)-T(i,1))*2*h_1/(rho_c*(840+420*T(i,1)/850)*dz)-(T(i,1)-T(i,2))*2*(1.6-0.6*T(i,1)/850)/rho_c*(840+420*T(i,1)/850)*dz^2+T(i,1);

else

T(i+1,j)=(0.008*T(i,j)+6)*dt/(dz^2*10^6)*(T(i,j+1)+T(i,j-1))+(1-2*(0.008*T(i,j)+6)*dt/(dz^2*10^6))*T(i,j);

end

end

else

for j = 1 : 20

if j == 1

T(i+1,1)=(293-T(i,1))*2*h_2/(rho_c*(840+420*T(i,1)/850)*dz)-(T(i,1)-T(i,2))*2*(1.6-0.6*T(i,1)/850)/rho_c*(840+420*T(i,1)/850)*dz^2+T(i,1);

else

T(i+1,j)=(0.008*T(i,j)+6)*dt/(dz^2*10^6)*(T(i,j+1)+T(i,j-1))+(1-2*(0.008*T(i,j)+6)*dt/(dz^2*10^6))*T(i,j);

end

end

end

end
